# Supplementary material for: Extremely Elevated Total Mercury and Methylmercury in Forage Plants in a World Large-scale Abandoned Hg Mining Site: A Potential Risk of Exposure to Grazing Animals
Source: Research Square preprint supplement (doi:10.21203/rs.3.rs-175400/v1), 2021-02-09

**Extremely elevated total mercury and methylmercury in forage plants in a world large-scale abandoned Hg mining site: A potential risk of exposure to grazing animals**

Xiaoli Qiana,b, Chendong Yanga,b, Xiaohang Xuc, Ming Aoa,b, Zhidong Xuc, Yonggui Wua,b**, Guangle Qiuc,*

aCollege of Resources and Environmental Engineering, Guizhou University, Guiyang 550025, China

bKey Laboratory of Karst Georesources and Environment, Ministry of Education, Guizhou University, Guiyang 550025, China

cState Key Laboratory of Environmental Geochemistry, Institute of Geochemistry, Chinese Academy of Sciences, Guiyang 550081, China

**Correspondence**

*Guangle Qiu, State Key Laboratory of Environmental Geochemistry, Institute of Geochemistry, Chinese Academy of Sciences, Guiyang 550081, P. R. China. E-mail: [qiuguangle@vip.skleg.cn](mailto:qiuguangle@vip.skleg.cn) Phone: 0086-851-84396675 Fax: 0086-851-85891605.

**Yonggui Wu, College of Resources and Environmental Engineering, Guizhou University, Guiyang 550025, P. R. China. E-mail: ygwu72@126.cm Phone: 0086-851-83627126 Fax: 0086-851-83627126.

**Table S1**

The mine-waste tailing piles and plant species inhabiting the wastelands of the Wanshan Hg mining region, Guizhou Province, Southwest China

| **Tailings pile** | **Description*** | **Plant names** | **Family** | **Biotype** |
| --- | --- | --- | --- | --- |
| Chongjiao | The tailings were 200 thousand cubic meters mainly came from the SK. Hg concentration of leachate reached up to 0.058 mg/L. The Hg concentrations in sediment and soil were 18 mg/kg and 125 mg/kg, respectively. | *Aster ageratoides* Turcz; *Aster subulatus* Michx*.* | *Asterlinn* | Perennial herb |
| *Buddleja davidii* Franch. | *Buddleja* | Perennial shrub |
| *Cibotium barometz*(*L.*) *J.Sm* | *Woodwardia* | Perennial tree fern |
| *Conyza canadensis*(*L.*) | *Conyza* | Annual herb |
| *Corydalis edulis* Maxim. | *Crydalis* | Annual herb |
| *Gynura bicolor*(*Roxb. Ex Willd*) DC. | *Gynura* | Perennial herb |
| *Herba artimisiae sieversianae* | *Asteraceae* | Biennial herb |
| *Ipomoea batatas*(L.) Lam. | *Artemisia* | Annual herb |
| *Rumex japonicus* | *RumexLinn* | Annual herb |
| *Sonchus brachyotus; Sonchus oleraceus* | *Sonchus* | Annual herb |
| Lengfengdong | The tailings were 200 thousand cubic meters, which was from the WK. Hg in leachate was 0.061 mg/L. The Hg concentrations in sediment and soil were 56 mg/kg and 278 mg/kg, respectively. | *Aster ageratoides* | *Asterlinn* | Perennial herb |
| *Buddleja davidii* Franch. | *Buddleja* | Perennial shrub |
| *Herba artimisiae sieversianae* | *Asteraceae* | Biennial herb |
| *Houttuynia cordata Thunb.* | *Houttuynia* | Perennial herb |
| *Oenanthe javanica* | *Oenanthe* | Perennial herb |
| *Primula sikkimensis Hook* | *Primulalinn* | Perennial herb |
| *Portulaca oleracea* | *Portulacaceae* | Annual herb |
| *Rumex japonicus* | *RumexLinn* | Annual herb |
| Meizixi | The tailings were 30 thousand cubic meters, which was from SBK and MZX. Hg in leachate was 0.021 mg/L. The Hg concentrations in sediment and soil were 75 mg/kg and 25 mg/kg, respectively. The Hg concentrations in rice, wheat, corn, cabbage and pepper were 0.68, 0.32 mg/kg, 0.21 mg/kg, 0.982 mg/kg, and 0.27 mg/kg, on average, respectively. | *Aster subulatus Michx.* | *Asterlinn* | Perennial herb |
| *Brassica campestris L.* | *Brassica* | *Annual herb* |
| *Conyza canadensis*(*L.*) | *Conyza* | Annual herb |
| *Herba artimisiae sieversianae* | *Asteraceae* | Biennial herb |
| *Houttuynia cordata Thunb.* | *Saururaceae* | Perennial herb |
| *Ipomoea batatas*(L.) Lam. | *Houttuynia* | Annual herb |
| *Mentha haplocalyx Briq.* | *MenthaLinn* | Perennial herb |
| *Plantago asiatica* | *Plantaginaceae* | Annual herb |
| *Primula sikkimensis Hook* | *Primulalinn* | Perennial herb |
| *Rumex acetosa; Rumex japonicus* | *RumexLinn* | Annual herb |
| *Sedum bulbiferum; Sedum emarginatum* | *Sedum Tourn* | Perennial herb |
| *Sonchus oleraceus* | *Sonchus* | Annual herb |

*Adopted from Economic development plan on mercury pollution control for Wanshan District, Local government report, 2010.

**Table S2**

Laboratory methods and quality assurance and quality control

| Methodology | Measurement | Sample Type | Certified reference material | Concentration ranged mg/kg for THg, µg/kg for MeHg | Recoveries ranged mg/kg for THg, µg/kg for MeHg | Relative error % in duplicate samples |
| --- | --- | --- | --- | --- | --- | --- |
| Acid digestion, SnCl2 reduction, purge, and AAS detection according to Qiu et al. (2005) | THg | Soil | GBW07405 Red-to-Yellow soil, CSMRC, China. | 0.29±0.04 | 0.32±0.02 | <5 |
| THg | Plant | BCR-482 Lichen, IRMM | 0.48±0.02 | 0.475±0.02 | <5 |
| Aqueous ethylation, purge, trap, and GC-CVAFS detection following US EPA method 1630 (2001) | MeHg | Soil | ERM-CC580 Estuarine sediment, IRMM | 75.5±3.7 | 75.0±3.1 | <5 |
| MeHg | Plant | Tort-2 Lobster Hepatopancreas, NRC, Canada. | 152±13 | 155±25 | <10 |

**Figure S1**

The differences in THg and MeHg of soils and plants among the three sampling sites


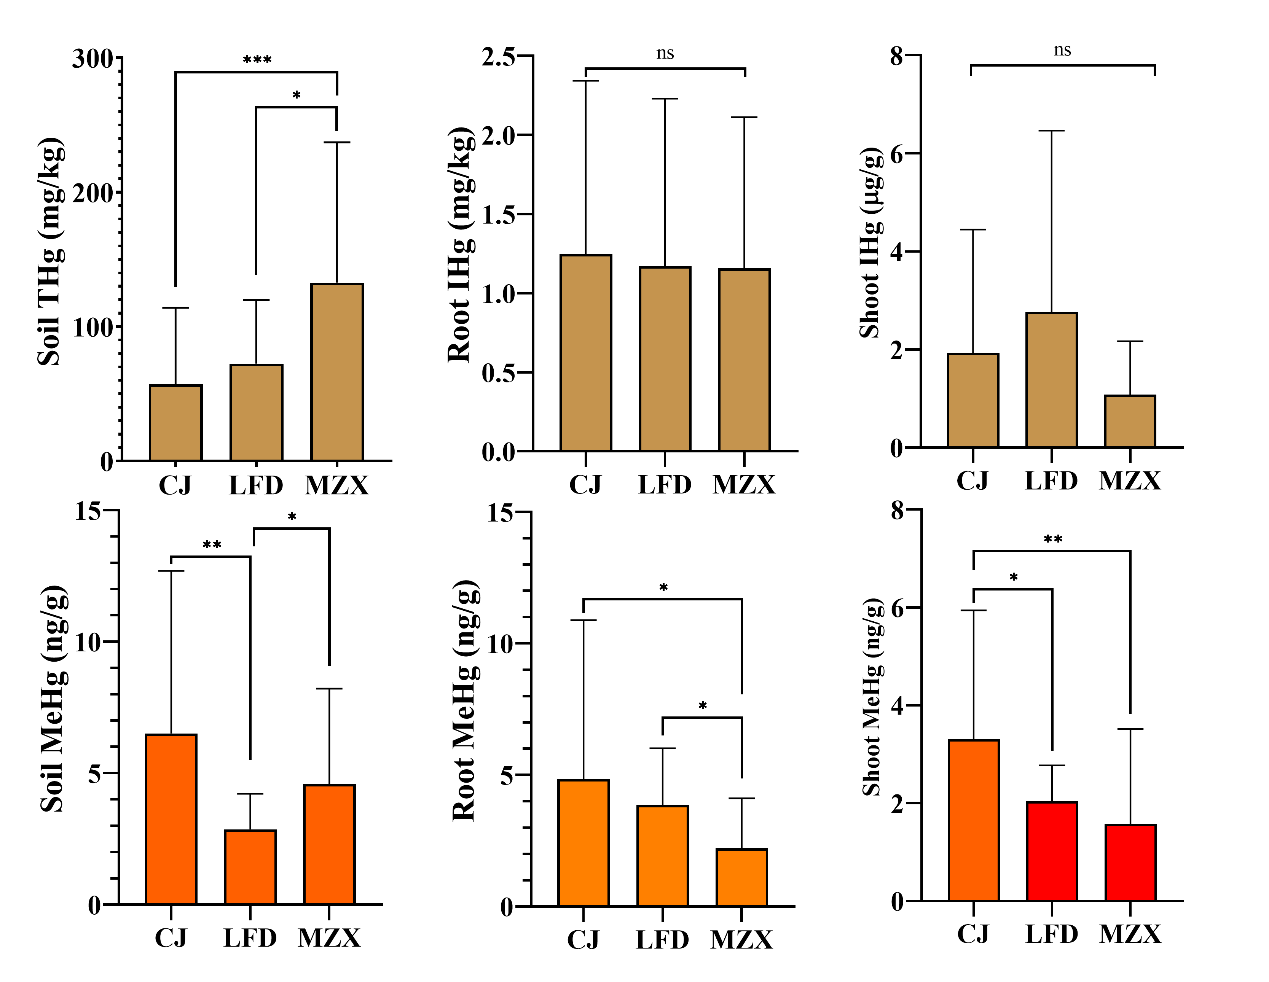

Supplement: Supplementary file 1 [file 38c5e3f5e41080c76338920d.docx]
